# Supplementary material for: Risk factors for endocrine complications in transfusion-dependent thalassemia patients on chelation therapy with deferasirox: a risk assessment study from a multi-center nation-wide cohort
Source: PubMed Central journal article supplement — Haematologica. 2021 Jan 7;107(2):467–77. doi: 10.3324/haematol.2020.272419 (PMC8804575; doi:10.3324/haematol.2020.272419), 2021-01-07

## Risk factors for endocrine complications in transfusion-dependent thalassemia patients on chelation therapy with deferasirox: a risk assessment study from a multi-center nation-wide cohort

Maddalena Casale,<sup>1</sup> Gian Luca Forni,<sup>2</sup> Elena Cassinerio,<sup>3</sup> Daniela Pasquali,<sup>4</sup> Raffaella Origa,<sup>5</sup> Marilena Serra,<sup>6</sup> Saveria Campisi,<sup>7</sup> Angelo Peluso,<sup>8</sup> Roberta Renzi,<sup>9</sup> Alessandro Cattoni,<sup>10</sup> Elisa De Michele,<sup>11</sup> Massimo Allò,<sup>12</sup> Maurizio Poggi,<sup>13</sup> Francesca Ferrara,<sup>14</sup> Rosanna Di Concilio,<sup>15</sup> Filomena Sportelli,<sup>16</sup> Antonella Quarta,<sup>17</sup> Maria Caterina Putti,<sup>18</sup> Lucia Dora Notarangelo,<sup>19</sup> Antonella Sau,<sup>20</sup> Saverio Ladogana,<sup>21</sup> Immacolata Tartaglione,<sup>1</sup> Stefania Picariello,<sup>1</sup> Alessia Marcon,<sup>3</sup> Patrizia Sturiale,<sup>22</sup> Domenico Roberti,<sup>1</sup> Antonio Ivan Lazzarino<sup>23</sup> and Silverio Perrotta<sup>1</sup>

<sup>1</sup>Department of Woman, Child and General and Specialized Surgery, University of Campania Luigi Vanvitelli, Naples, Italy; <sup>2</sup>Center of Microcitemia and Congenital Anemias, Galliera Hospital, Genoa, Italy; <sup>3</sup>Rare Diseases Center, General Medicine Unit, IRCCS Ca' Granda Ospedale Maggiore Policlinico Section co, Milan, Italy; <sup>4</sup>Endocrinology Unit, Department of Advanced Medical and Surgical Sciences, University "Luigi Vanvitelli", Naples, Italy; <sup>5</sup>Thalassemia Center, Pediatric Hospital A CAO, AOG Brotzu, Cagliari, Italy; <sup>6</sup>Thalassemia Center, Department of Internal Medicine, Hospital "V. Fazzi", Lecce, Italy; <sup>7</sup>Thalassemia Center, Hospital Umberto I, Siracusa, Italy; <sup>8</sup>Center of Microcitemia, POC SS. Annunziata - ASL TA, Taranto, Italy; <sup>9</sup>Thalassemia Center, Department of Internal Medicine, Hospital F. Ferrari, Casarano, Italy; <sup>10</sup>Department of Pediatrics, Università degli Studi di Milano Bicocca, Fondazione Monza e Brianza per il Bambino e la sua Mamma, Azienda Ospedaliera San Gerardo, Monza, Italy; <sup>11</sup>Immunotransfusion Medicine Unit, AOU OO.RR. S. Giovanni di Dio e Ruggi d'Aragona, Salerno, Italy; <sup>12</sup>Center of Microcitemia, Hospital ASL 5, Crotone, Italy; <sup>13</sup>Department of Endocrinology, Sant'Andrea Hospital, Rome, Italy; <sup>14</sup>Department of Internal Medicine, Policlinico Hospital of Modena, Modena, Italy; <sup>15</sup>Department of Pediatrics, Hospital Umberto I, Nocera, Italy; <sup>16</sup>Immunotransfusion Unit, Hospital Riuniti, Foggia, Italy; <sup>17</sup>Center for Microcythemia, Iron Metabolism Disorders, Gaucher Disease - Hematology and Transplantation Unit, "A. Perrino" Hospital, Brindisi, Italy; <sup>18</sup>Department of Women's and Child's Health (DSDB), University Hospital, Padova, Italy; <sup>19</sup>Hematology Oncology Unit, Children's Hospital, ASST Spedali Civili, Brescia, Italy; <sup>20</sup>Department of Pediatric Hematology and Oncology, Hospital "Spirito Santo", Pescara, Italy; <sup>21</sup>Pediatric Oncohematology Unit, "Casa Sollievo della Sofferenza" Hospital, IRCCS, San Giovanni Rotondo, Italy; <sup>22</sup>SSD Microcitemia Center, G.O.M Reggio Calabria, Reggio Calabria, Italy and <sup>23</sup>EPISTATA - Agency for Clinical Research and Medical Statistics, London, UK

©2022 Ferrata Storti Foundation. This is an open-access paper. doi:10.3324/haematol.2020.272419

Received: September 18, 2020.

Accepted: December 22, 2020.

Pre-published: January 7, 2021.

Correspondence: *MADDALENA CASALE* - maddalena.casale@unicampania.it

## **Supplemental Material**

### **Online Supplementary Methods**

Standardized protocols for the management of the disease were shared and discussed during meetings hold with clinicians from each centre. All consecutive patients visited at the participating sites since September 2009 were recruited into the cohort provided the inclusion criteria were met: affected by TDT and assigned to long- term deferasirox monotherapy. All patients included in the study had to maintain the same chelator during the observation in order to avoid biases related to the change of chelator drug. In the event of patient death, the collection was performed until the last available assessment. In the event of deferasirox discontinuation, endocrine data were collected until the time of discontinuation, along with reasons for discontinuation, such as adverse events, therapy failure, poor compliance, medical decision, etc. For those patients who started deferasirox therapy prior to 2009 and were still on the same chelation therapy at the study enrolment, the observation time was extended to the start of the deferasirox therapy. All centres followed standardized protocols, also for the transfusion program,<sup>18</sup> maintaining pre-transfusion haemoglobin above 9-10.5 g/dl or higher levels for children or patients with cardiac complications ( $\geq 10.5$  g/dl). Some variables were routinely measured in adults, such as estradiol, testosterone, LH, and FSH, BMD.

**Supplemental Material 1.** Crude survival curve for all patients (n=426, events=104), with age as the underlying time variable.

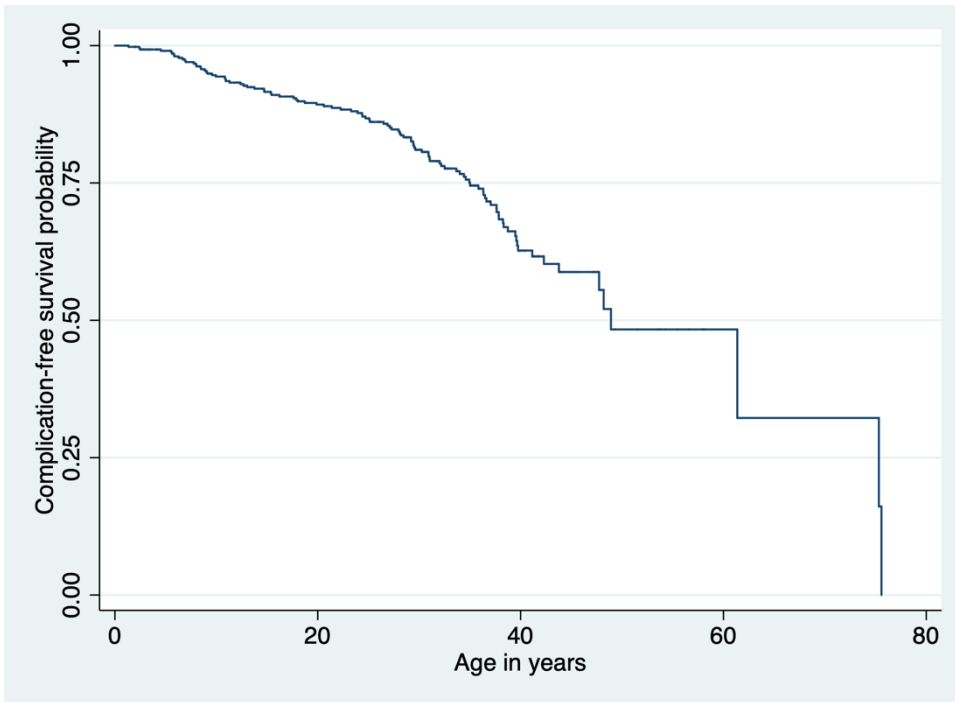

**Supplemental Material 2.** Crude survival curve for patients with no endocrinopathies at baseline (n=118, events=43), with age as the underlying time variable.

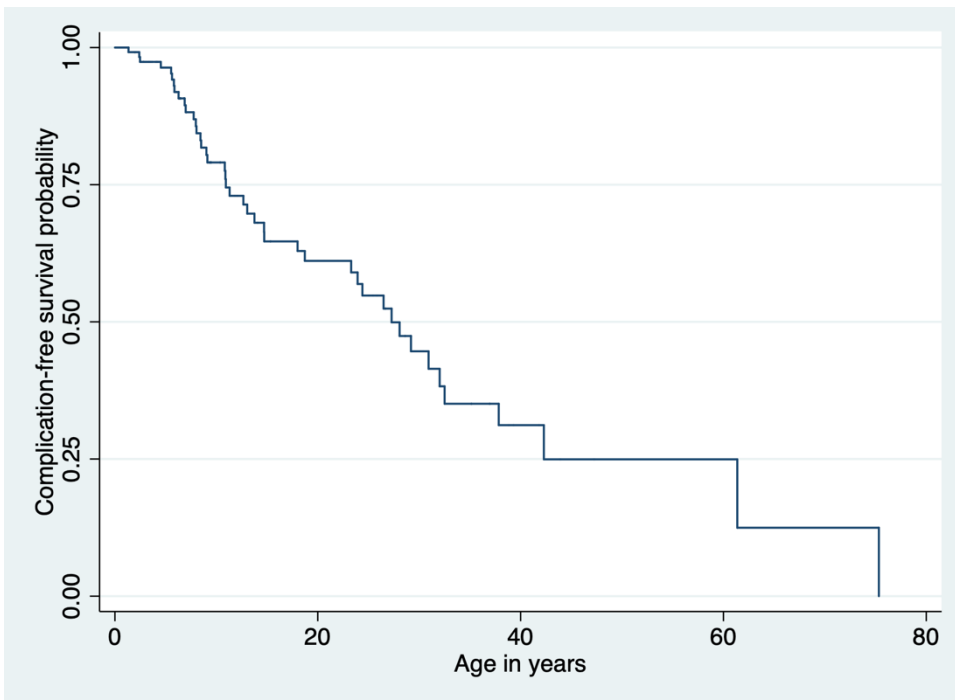

**Supplemental Material 3.** Survival curves by number of endocrinopathies at baseline, adjusted for age and TSH.

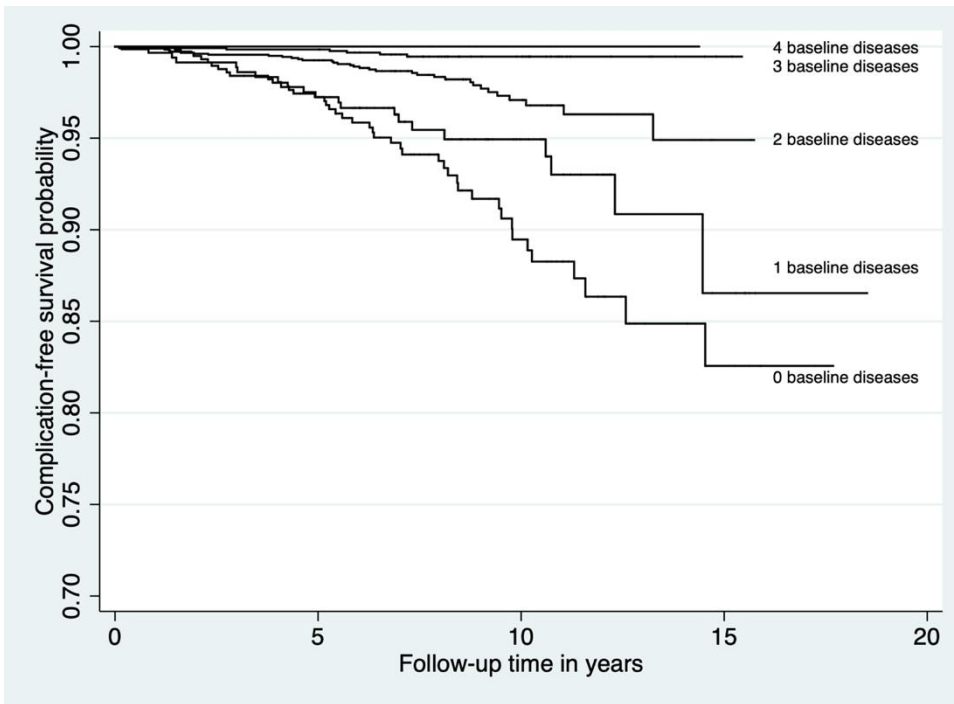

**Supplemental Material 4.** Survival curves by age group, adjusted for TSH and number of endocrine diseases at baseline.

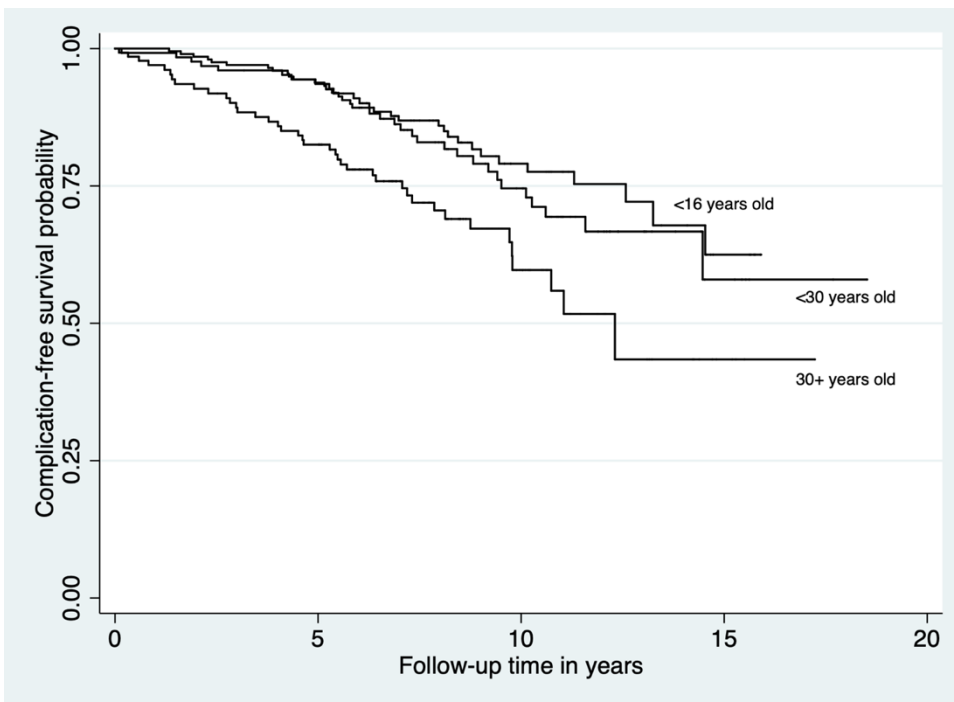

**Supplemental Material 5.** Survival curves by levels of TSH, adjusted for age and number of endocrine conditions at baseline.

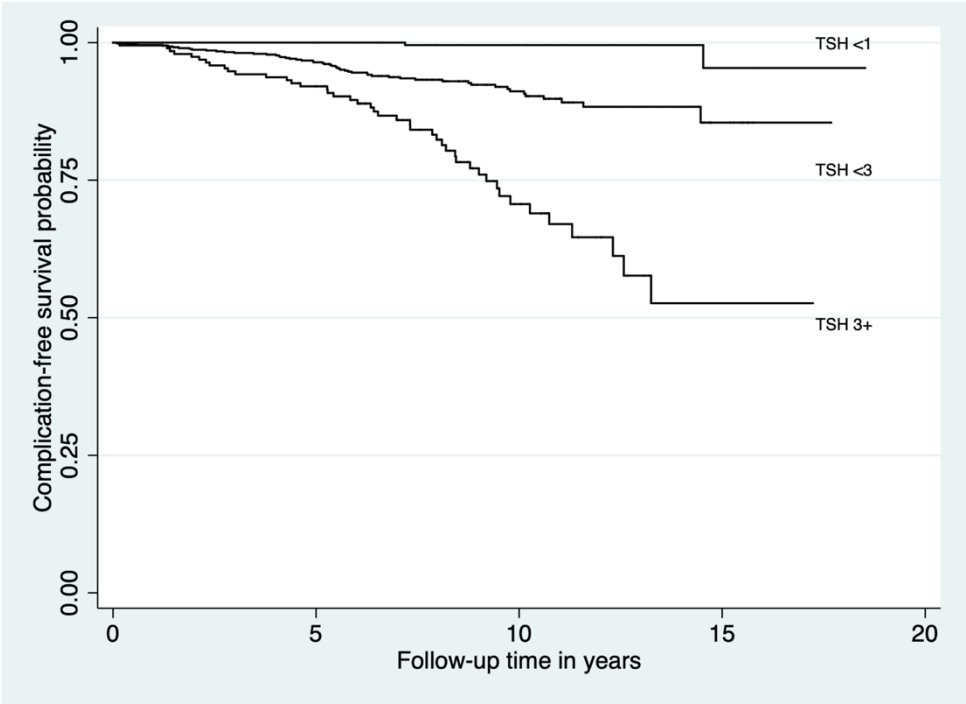

Supplement: 2020_272419_CASALE_SUPPL.pdf [file 2020_272419_CASALE_SUPPL.pdf]
